# Supplementary material
Source: PubMed Central journal article supplement (PMC3653208)
Supplement: supp_WNL.0b013e3182840c84_Figures_e-1_and_e-2.pdf [file supp_WNL.0b013e3182840c84_Figures_e-1_and_e-2.pdf]

Figure e-1.

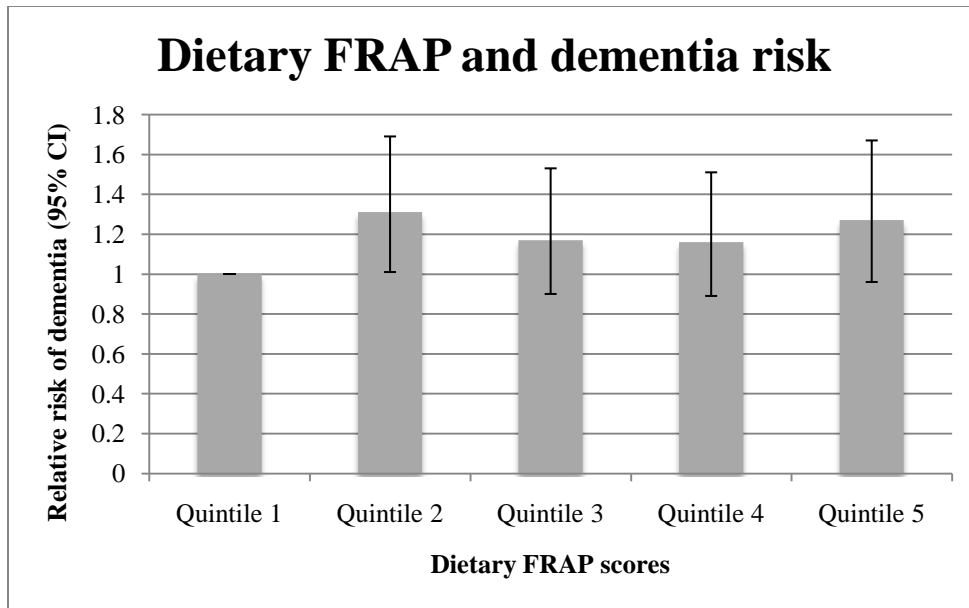

(A) The association between dietary FRAP scores (in quintiles) and risk of dementia in the Rotterdam Study.

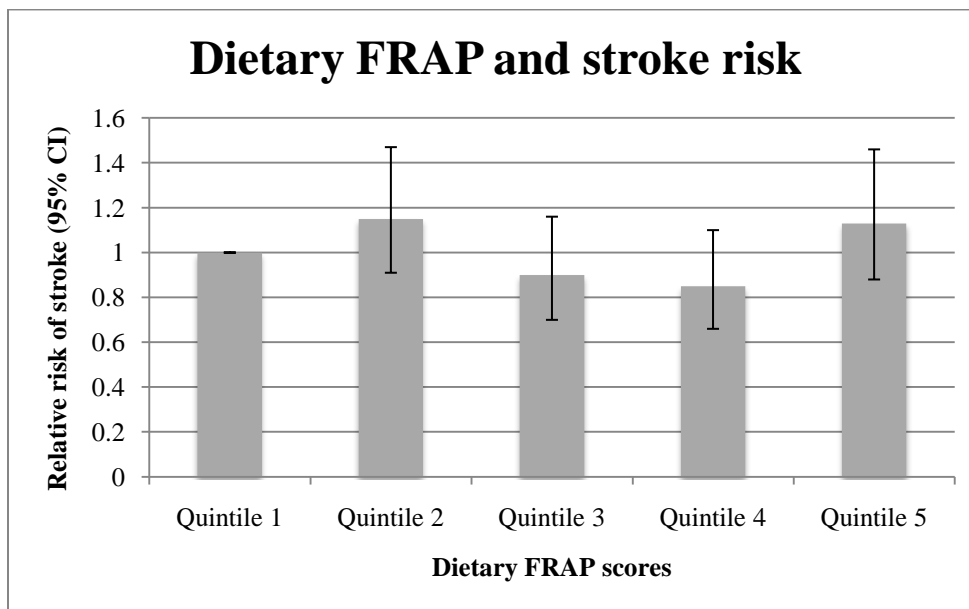

(B) The association between dietary FRAP scores (in quintiles) and risk of dementia in the Rotterdam Study.

Figure e-2.

(A)

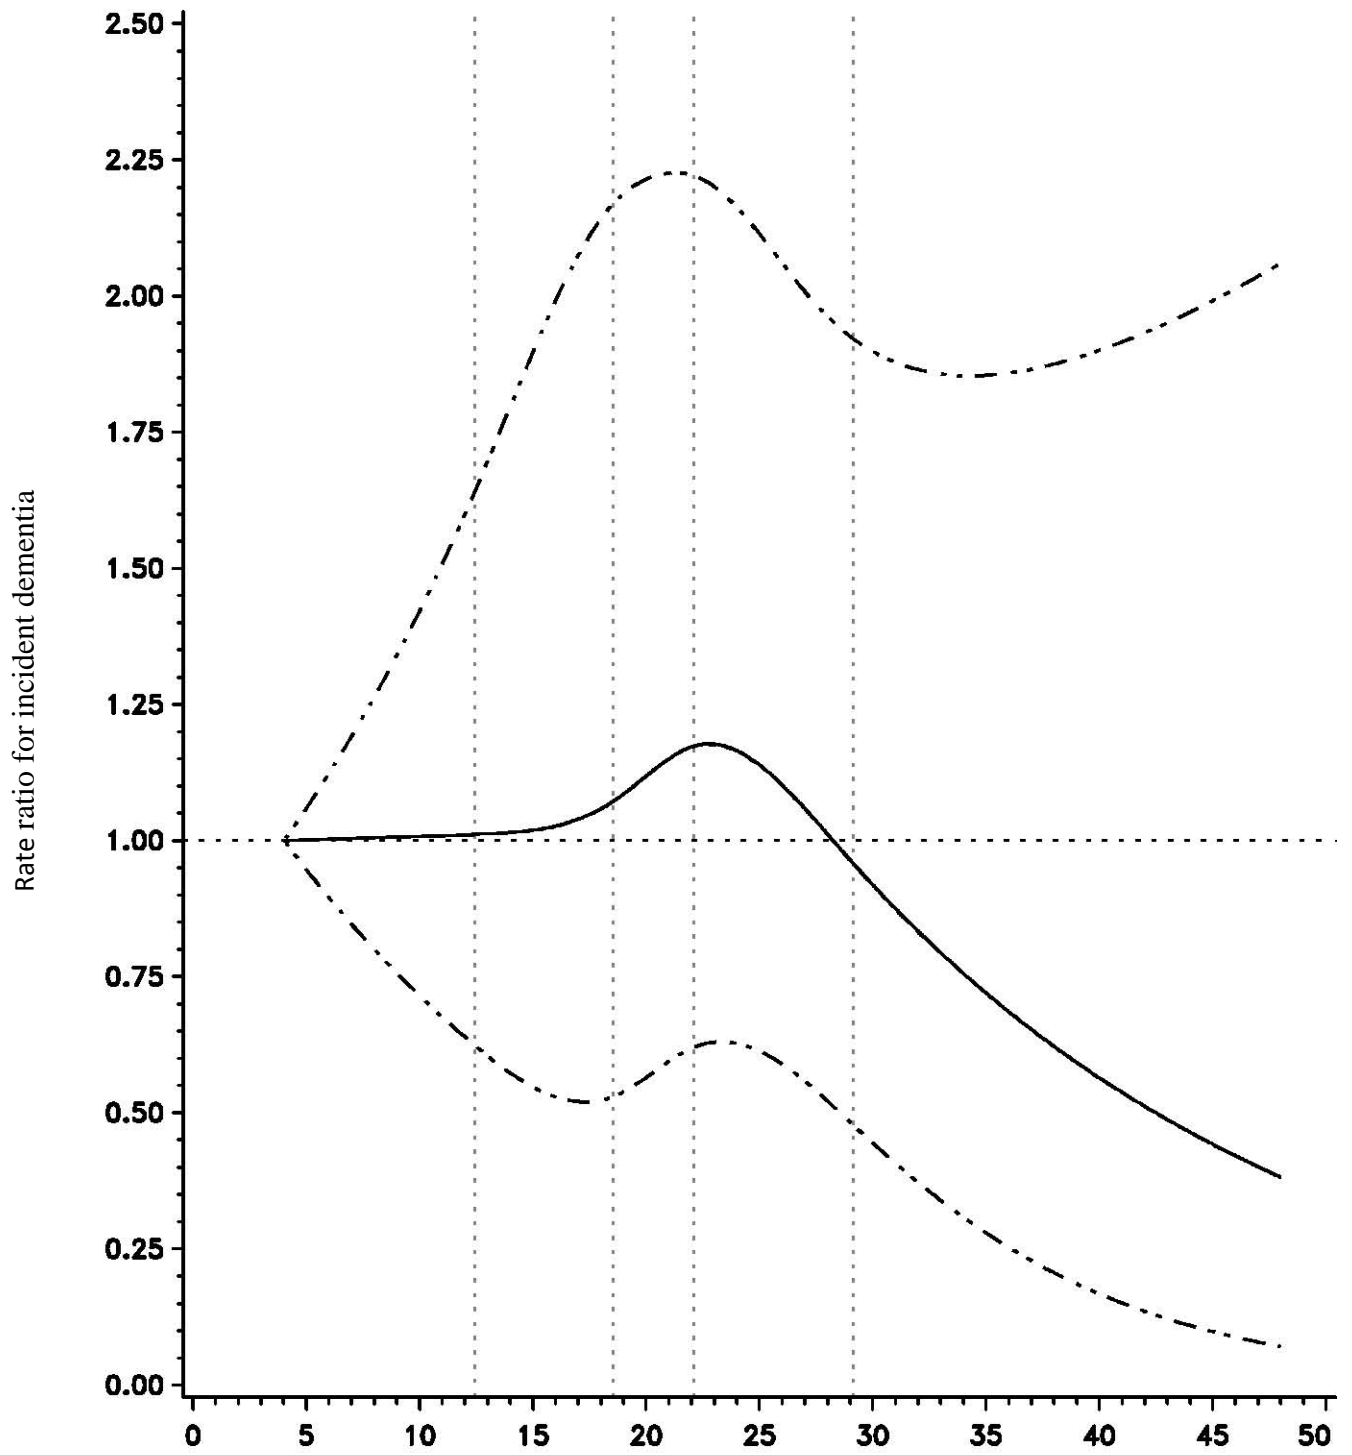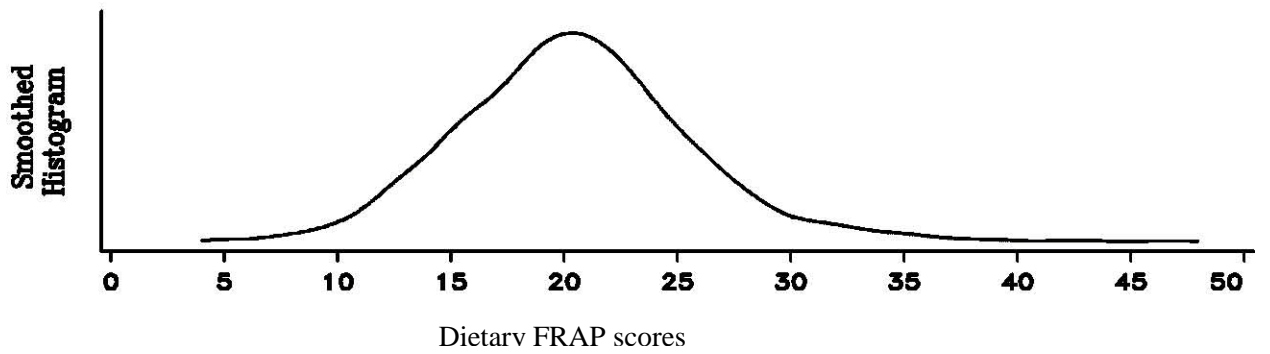

(A) Representation of cubic spline regression model for dietary FRAP scores and dementia risk.

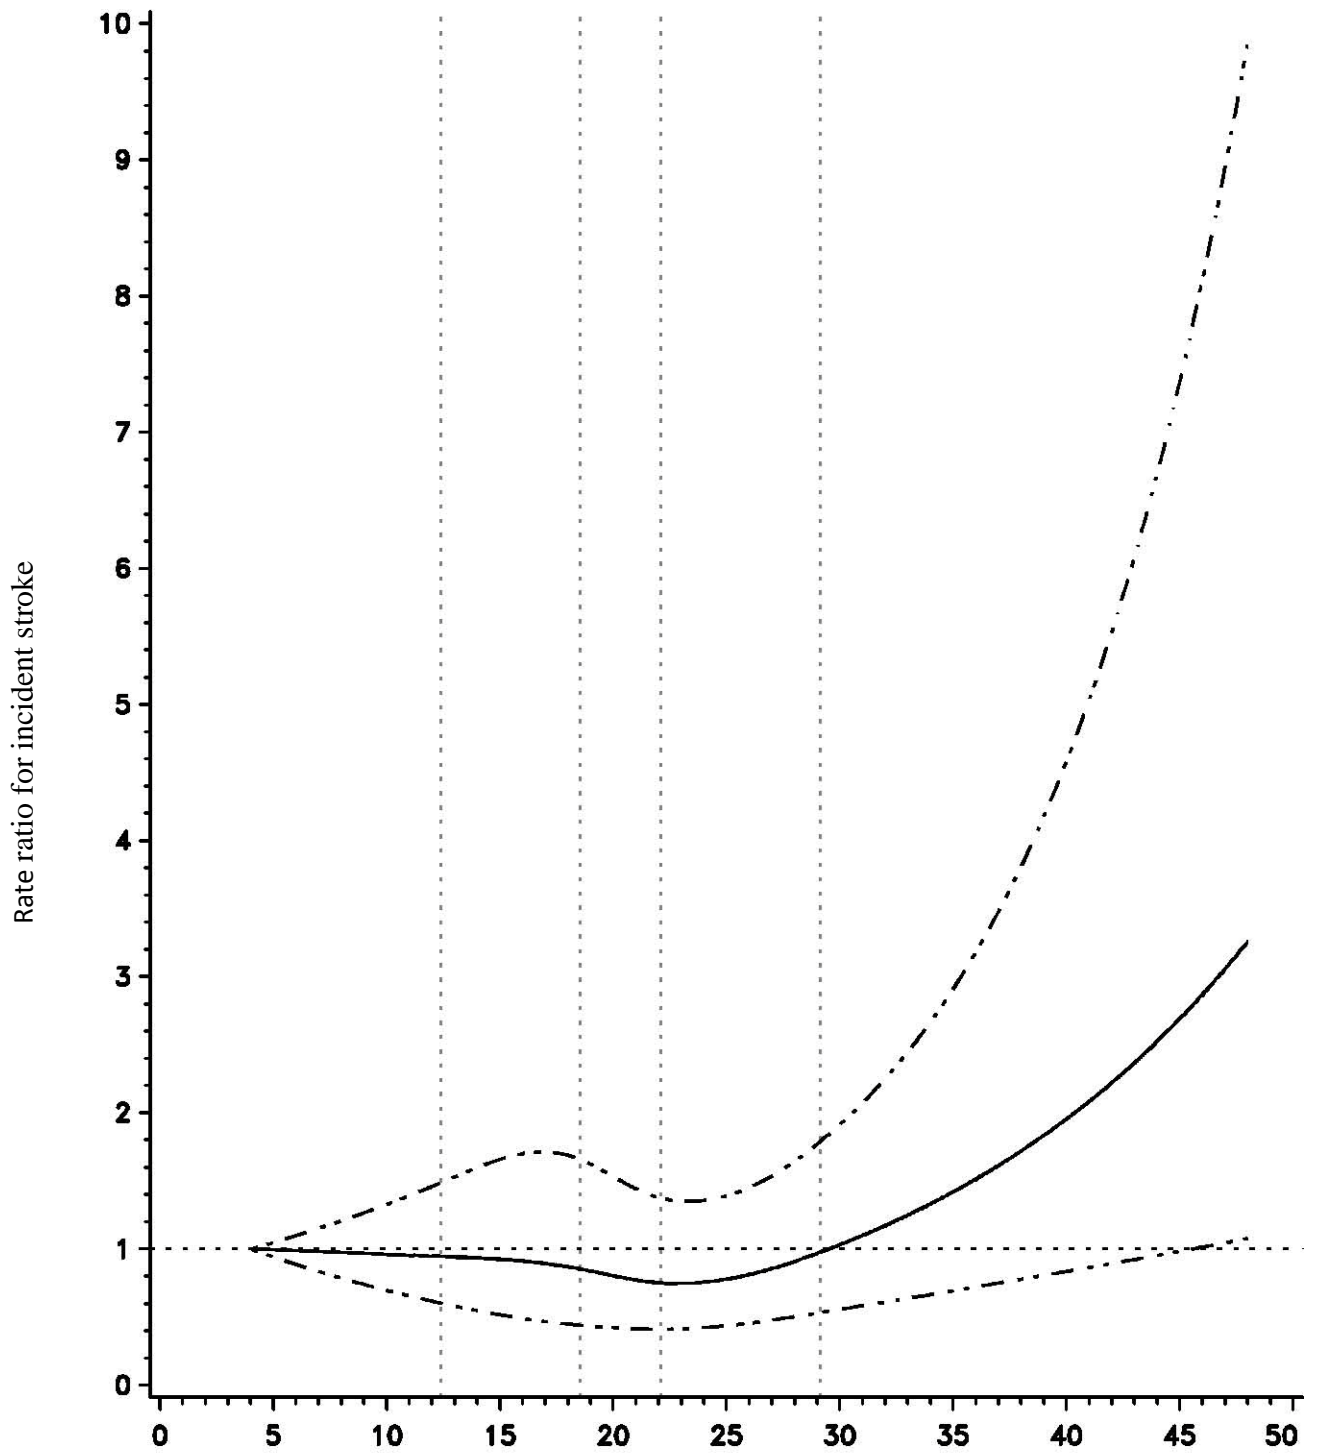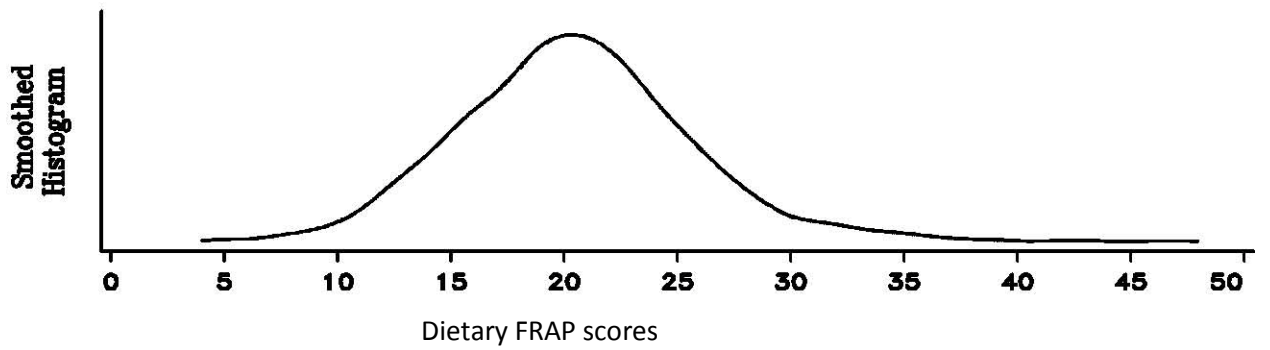

(B) Representation of cubic spline regression model for dietary FRAP scores and stroke risk.
